# Supplementary material
Source: MDPI journal article supplement (https://www.mdpi.com/2077-0472/12/4/495)

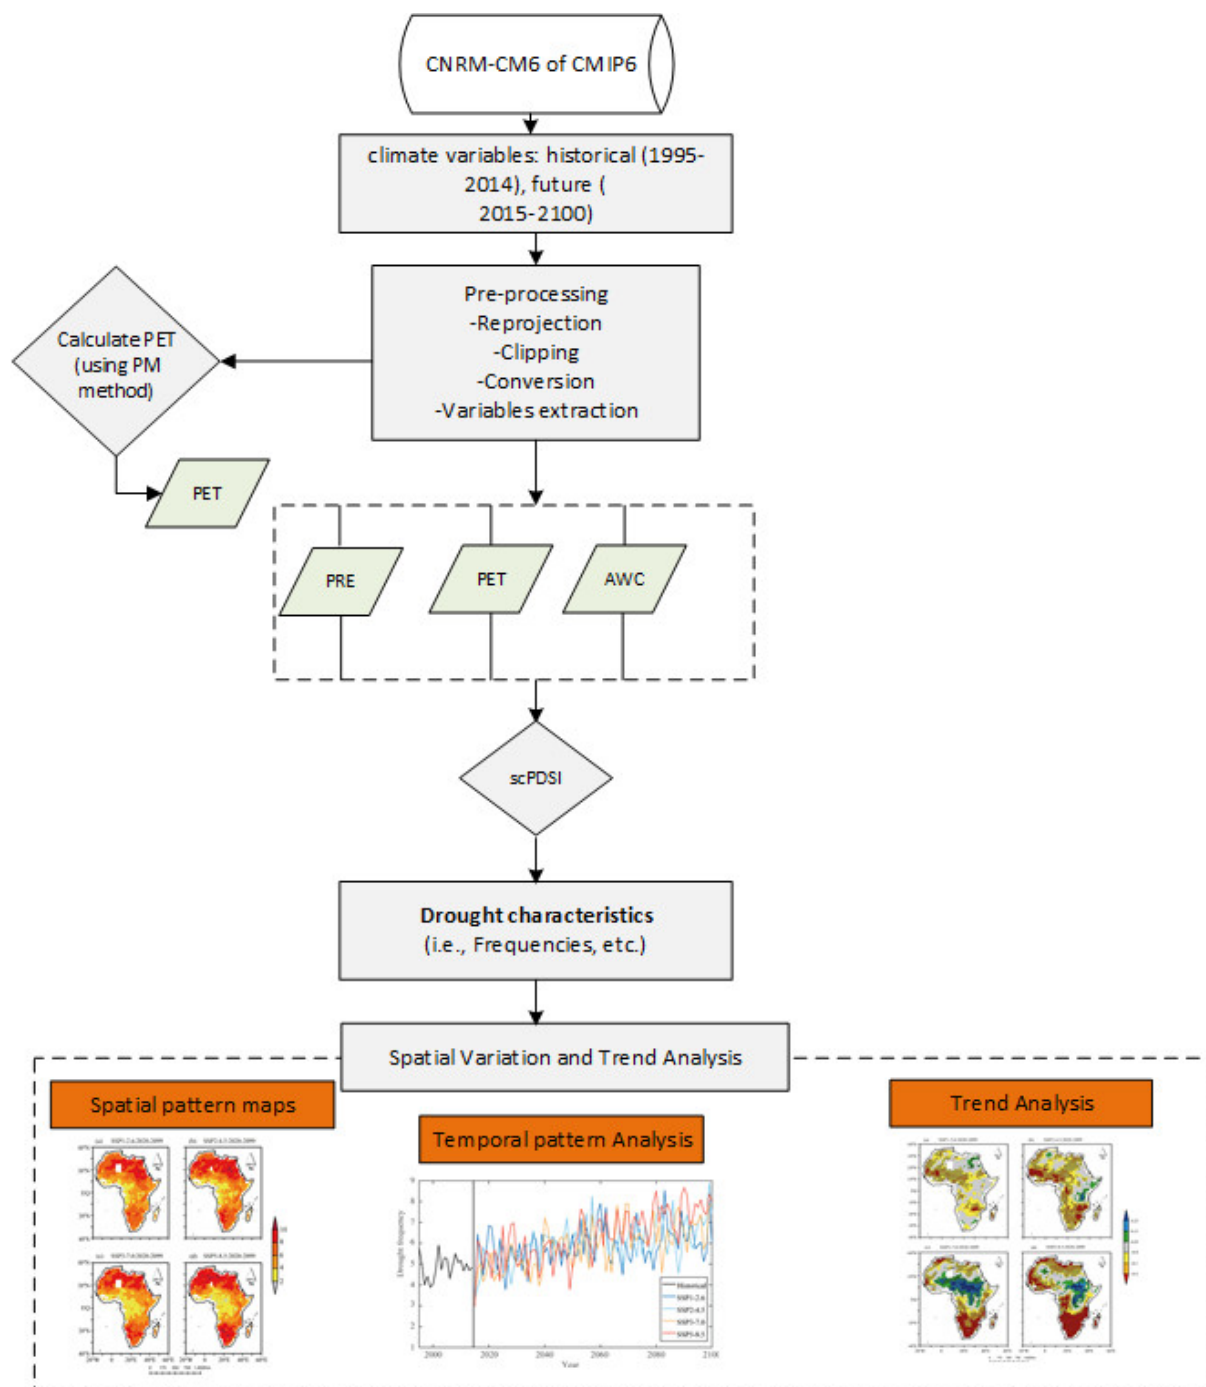

Figure S1: Methodological Flowchart

Supplement: s1 [file s1]
